# Supplementary material
Source: publisher figshare collection journal article supplement (https://acs.figshare.com/ndownloader/files/20206119)
Supplement: Supplementary file 1 [file 20206119]

**Table S1.** Yield table of carboxymethyl chitosan (CMC)

| Amount<br>of<br>chitosan<br>(gram) | Yield<br>(gram) | Percentage<br>yield<br>(%) |
|------------------------------------|-----------------|----------------------------|
| 2                                  | 1.6±0.3         | 83.7±15.5                  |
| 4                                  | 3.7±0.2         | 93.4±6.4                   |
| 6                                  | 5.8±0.1         | 96.6±2.1                   |
| 8                                  | 6.7±0.5         | 84.4±6.3                   |
| 12                                 | 10.6±0.6        | 89.0±5.0                   |

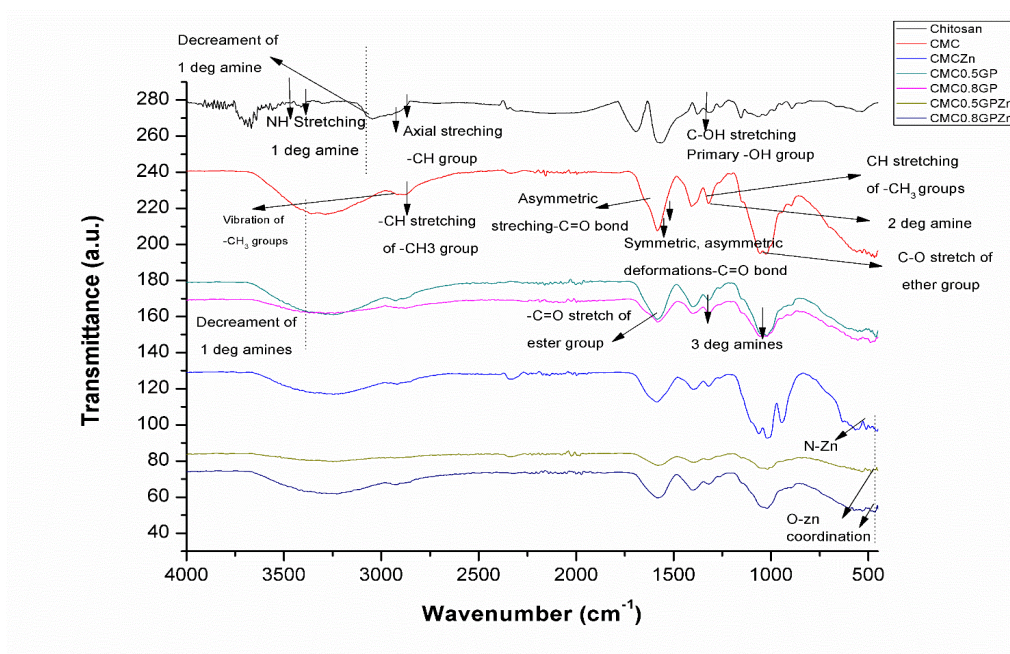

**Figure S1.** Fourier infrared spectroscopy (FT-IR) for all variables of scaffolds.

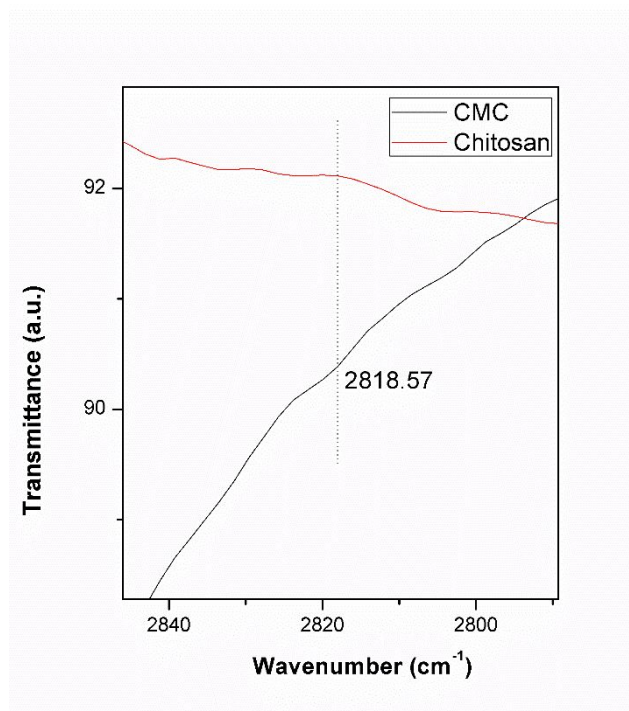

**Figure. S2a** Shows a zoomed image for methoxy peak seen in CMC due to C-H stretching of methyl groups attached to an ether residue.

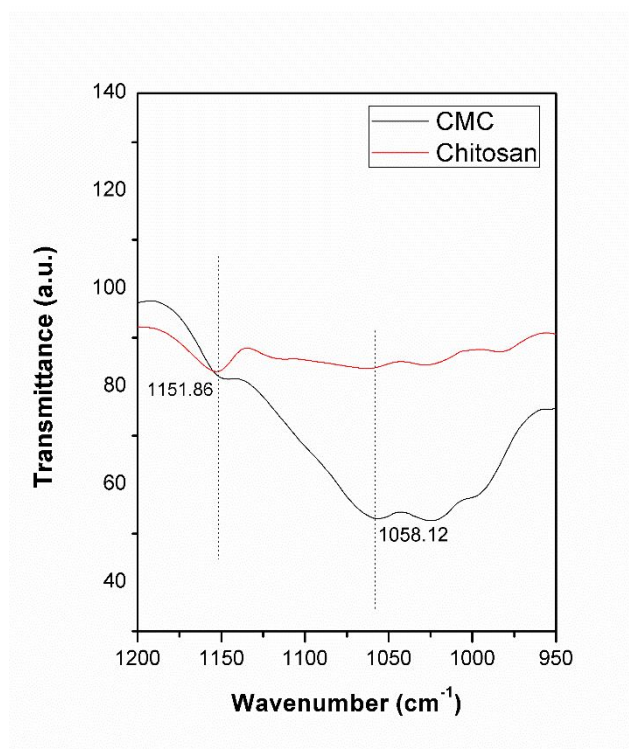

**Figure S2b** Shows a zoomed image for C-O stretch due to alkyl substituted ether and cyclic ether indicating the formation of O-substitution reaction.

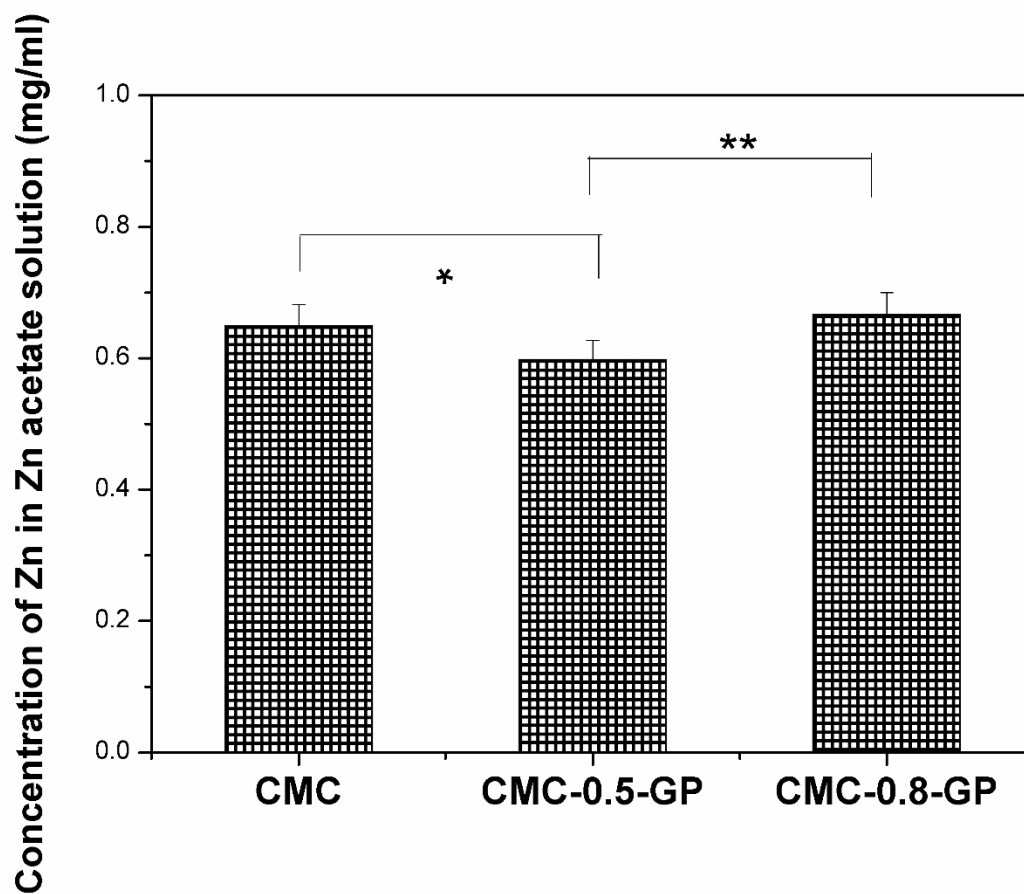

**Figure S3.** Represents AAS data for the amount of zinc left unconjugated in the solution. In both graphs, \* shows  $p < 0.05$  and \*\* for  $p < 0.005$ .

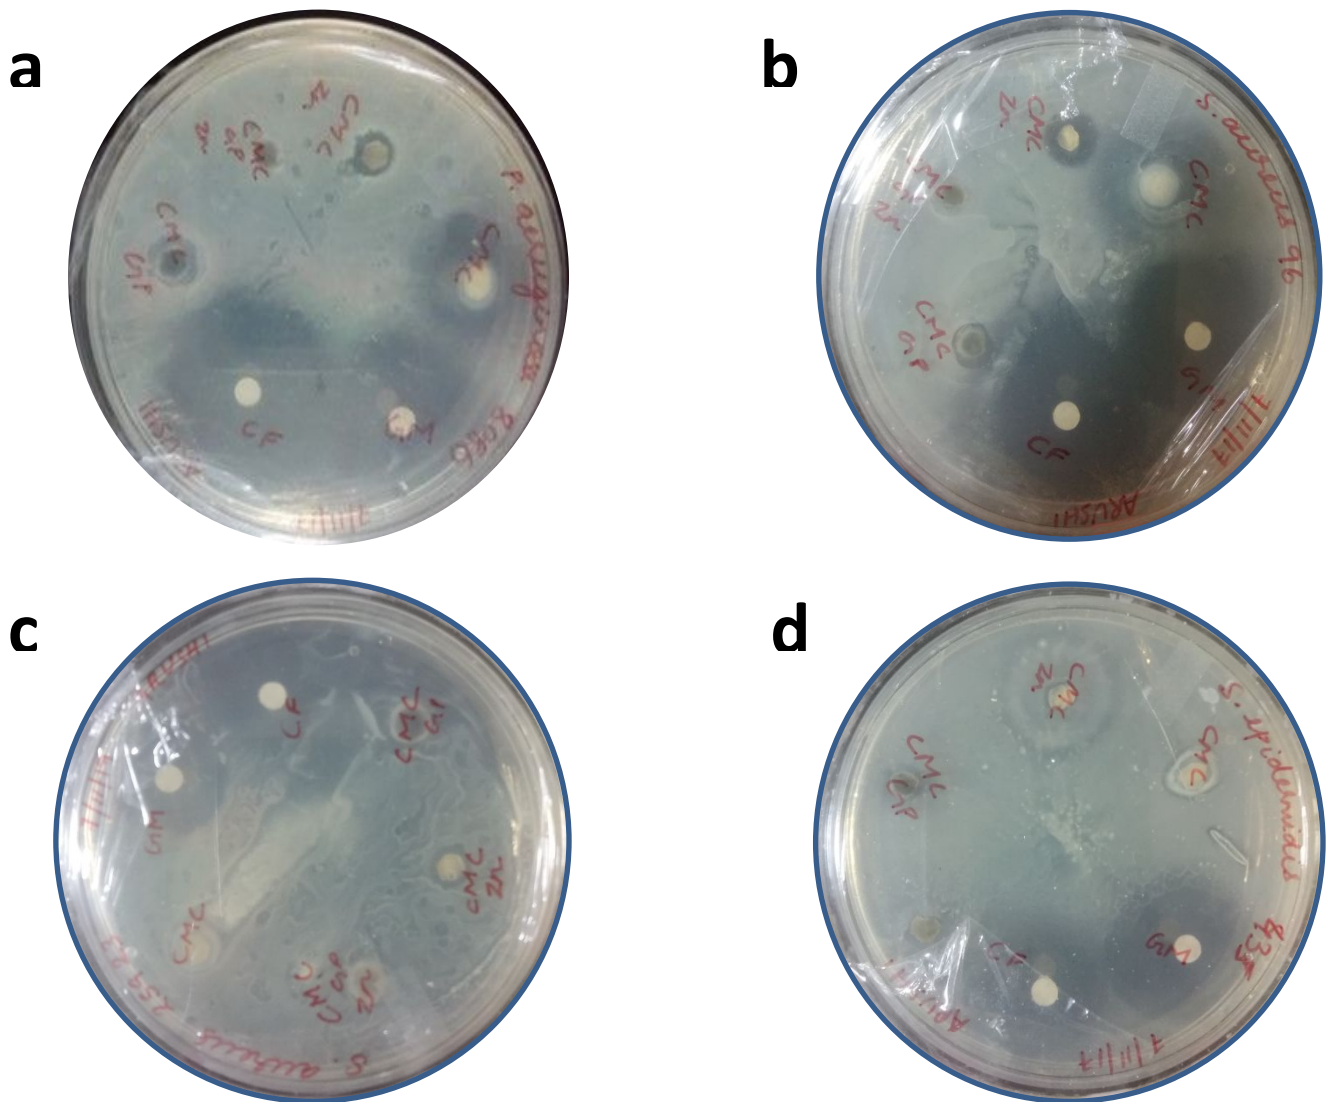

**Figure S4.** Collage shows the zone of inhibition for a) *P.aeruginosa* 8086 – strong biofilm forming b) *S.aureus* 96 – strong biofilm forming c) *S.aureus* 25923 – Non biofilm forming d) *S.epidermidis* 435 – Strong biofilm forming bacterial strains. The scaffolds did not show a significant zone of inhibition in comparison to the antibiotics- cefotaxime and gentamicin.
